# Supplementary material for: Control of the resistive switching voltage and reduction of the high-resistive-state current of zinc oxide by self-assembled monolayers
Source: Royal Society of Chemistry journal article supplement (doi:10.1039/d2cc06919a), 2023-01-01
Supplement: d2cc06919a1.pdf [file d2cc06919a1.pdf]

*Supporting Information for*

## **Control of Resistive Switching Voltage and Reduction of High-Resistive-State Current of Zinc Oxide by Self-Assembled Monolayers**

Masahiro Nakano<sup>[a],\*</sup> Hiroki Matsui<sup>[a]</sup>, Sae Nakagawa<sup>[a]</sup>, Jiaxun You<sup>[b]</sup>, Md. Shahiduzzaman<sup>[c]</sup>  
Makoto Karakawa<sup>[a,b,c,d]</sup>, Tetsuya Taima<sup>[a,b,c,d]</sup>

<sup>a</sup>Graduate School of Natural Science and Technology, Kanazawa University, Kakuma-machi, Kanazawa 920-1192, Japan.

<sup>b</sup>Graduate School of Frontier Science Initiative (InFiniti), Kanazawa University, Kakuma-machi, Kanazawa, Ishikawa 920-1192, Japan.

<sup>c</sup>Nanomaterial Research Institute (NanoMaRI), Kanazawa University, Kakuma-machi, Kanazawa, Ishikawa 920-1192, Japan.

<sup>d</sup>Institute for Frontier Science Initiative (InFiniti), Kanazawa University, Kakuma-machi, Kanazawa, Ishikawa 920-1192, Japan.

### Contents

1. Experimental
2. Water contact angle measurement
3. Fabrication of ZnO-based memory devices
4. Mechanism of resistive switching behaviour of ZnO-based memory devices
5. Durability of the ON and OFF states of the ZnO-based memories
6. Retention data of the ZnO-based memories
7. ZnO-based memory device with evaporated Al under  $10^{-2}$  Pa.
8. Sparse MAPS-modified ZnO-based memory device
9. References

## **1. Experimental**

### **1. Materials**

We used zinc acetylacetonate hydrate ( $\text{Zn}(\text{AcAc})_2$ , 99.995%, trace metals basis, Sigma-Aldrich) as a precursor for electron transporting layer film. The indium tin oxide (ITO) substrates (sheet resistance =  $10 \Omega \text{ sq}$ ) and Al (99.99%) were purchased from Furuuchi Chemical Corporation. Triethylsilane compounds and organic solvents for SAM-treatment were purchased from Tokyo Chemical Industry Co. Ltd. (TCI).

### **2. Fabrication of ZnO-based resistive memories**

An ITO-coated glass substrate was cleaned by ultrasonication in isopropanol. The ZnO precursor solution was prepared by dissolving  $\text{Zn}(\text{AcAc})_2$  (95 mg) in 2-methoxyethanol (10.0 mL) with small amount of acetyl acetone. A ZnO layer was prepared by spin coating of the precursor solution (1000 rpm, 60 s) and subsequent thermal annealing for 60 min at  $250^\circ\text{C}$  under ambient conditions. After preparation of SAMs on the ZnO, an Al electrode was deposited by thermal evaporation under vacuum through a metal mask (active area:  $10 \text{ mm}^2$ ). The current-voltage measurements were performed under nitrogen conditions using Keithley 4200A-SCS PARAMETER ANALYZER.

### **3. Preparation of SAMs on the ZnO films**

After the UV/ozone treatment of the ZnO-prepared ITO, SAM was formed on the activated substrates by immersing in a toluene solution of triethoxysilane compounds (50 mM) for 15 min at  $60^\circ\text{C}$ . Then, the substrate was rinsed with pure toluene and acetone. Following the final rinse step, the substrate was annealed on a hot plate at  $120^\circ\text{C}$  for 5 minutes under  $\text{N}_2$  atmosphere, and then the substrate was thoroughly washed with boiling toluene.

### **3. Analytical measurements**

ATR-IR spectra were recorded on FT/IR-460plus (JASCO Corporation). AFM images were measured with a SII SPI3800N AFM apparatus. WF values were measured by using Trek model 320C electrostatic voltmeter with Kelvin probe unit. XPS analysis were performed by using Shimadzu AXIS-ULTRA DLDXPS apparatus. AC-impedance measurements were carried out using E4980A

precision LCR meter (Agilent) under simulated sunlight irradiation. The frequency range was from 20 Hz to 1 MHz, the alternating signal magnitude was 5 mV and DC bias was 0 V. The data obtained were fitted with Scribner Associates Z-VIEW software v3.1 using the appropriate equivalent circuits. Water contact angles were observed using DMS-200 (Kyowa Interface Science Co. Ltd.).

## 2. Water contact angle measurement

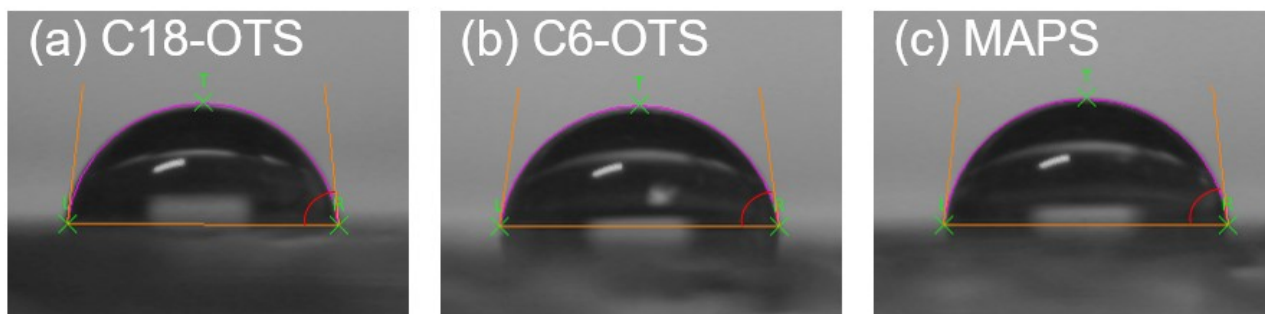

**Fig. S1.** Photographs of water droplet on (a) C18-OTS-, (b) C6-OTS-, and (c) MAPS-treated ZnO films.

## 3. Fabrication of ZnO-based memory devices

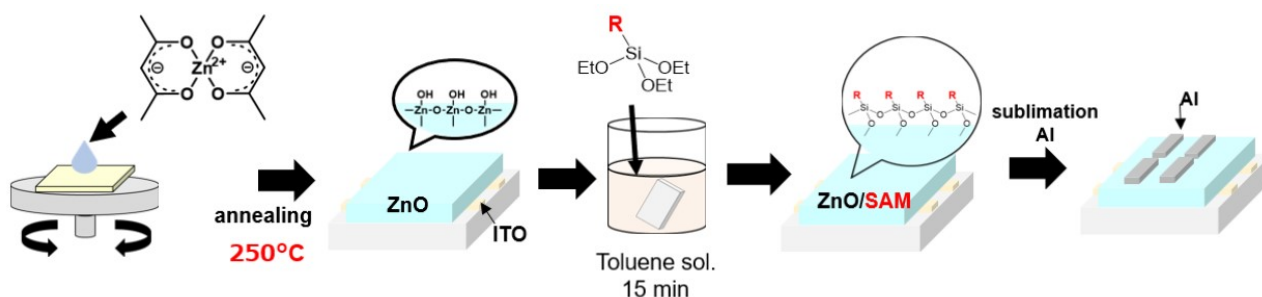

**Fig. S2.** Fabrication of ZnO-based memory devices.

## 4. Mechanism of resistive switching behaviour of ZnO-based memory devices

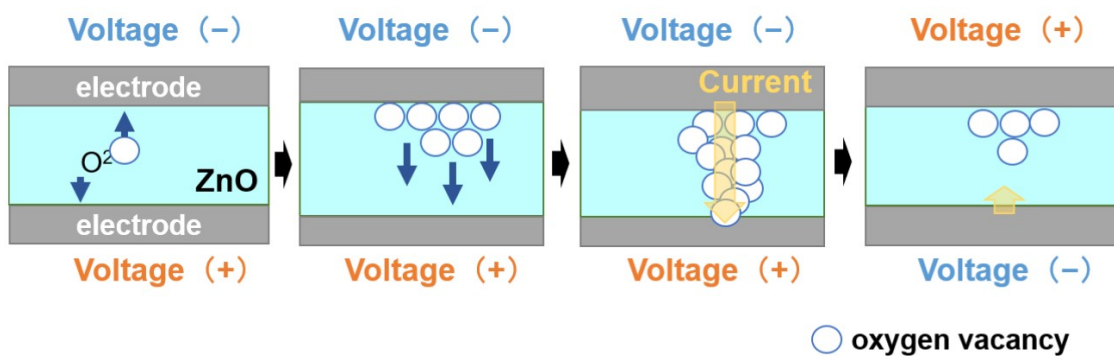

**Figure S3.** Schematic of mechanism of resistive switching behavior of ZnO-based memory devices.

## 5. Durability of the ON and OFF states of the ZnO-based memories

The durability of the ON and OFF states of the ZnO-based memory devices under an electrical stress was studied by subjecting the device to a continuous read pulse (1 V, 1 s) every 2 minutes for 12 h with the device in the OFF-state and then in the ON-state.<sup>1</sup> The OFF to ON state transition was obtained by the application of a 4.0 V pulse for the bare ZnO-based device and 2.7 V pulse for the MAPS-treated device.

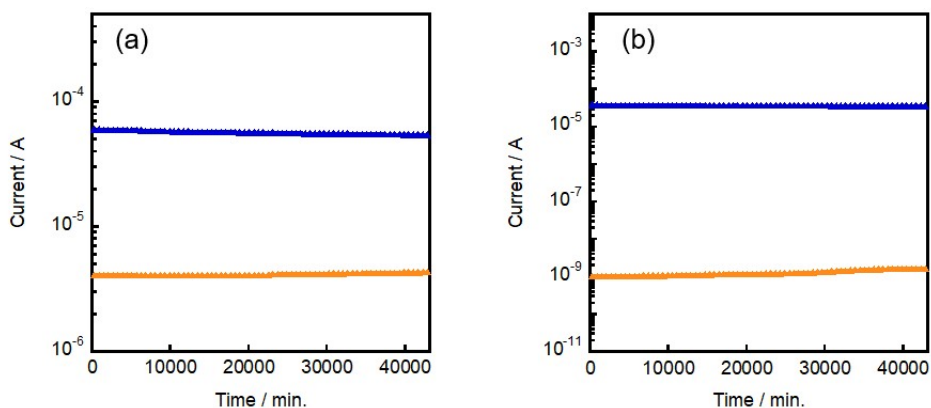

**Figure S4.** Durability of the ON and OFF states of bare ZnO- (a) and MAPS-treated ZnO- (b) based devices.

## 6. Retention data of the ZnO-based memories

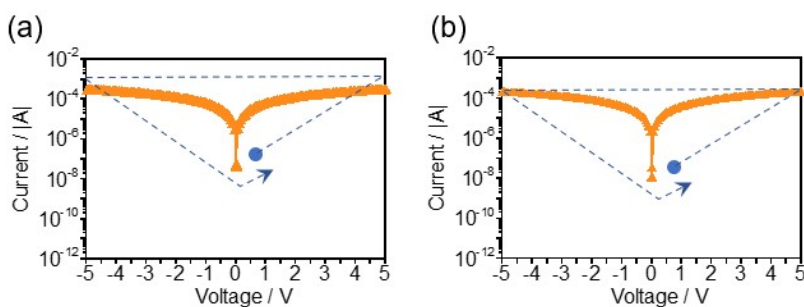

**Figure S5.** Cycle I-V properties of bare ZnO- (a) and MAPS-treated ZnO- (b) based devices (0 V to 5 V, back to -5 V, and again to 0 V, the second, third, and fourth cycles).

7. ZnO-based memory device with evaporated Al under  $10^{-2}$  Pa.

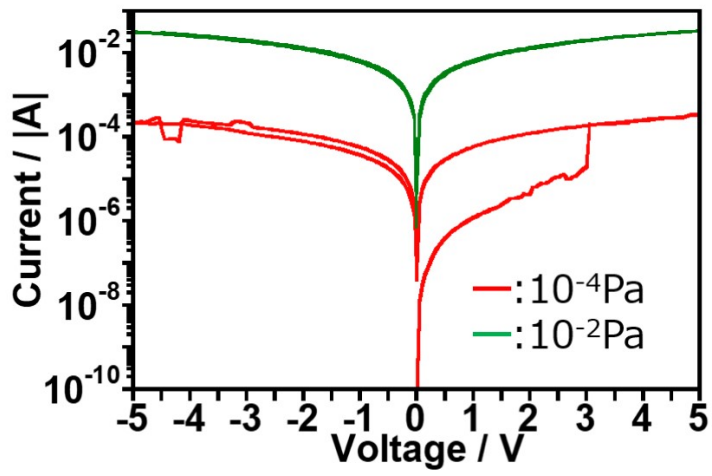

Figure S6. Current-voltage curves of ZnO-based memory device with evaporated Al under  $10^{-4}$  and  $10^{-2}$  Pa.

## 8. Sparse MAPS-modified ZnO-based memory device

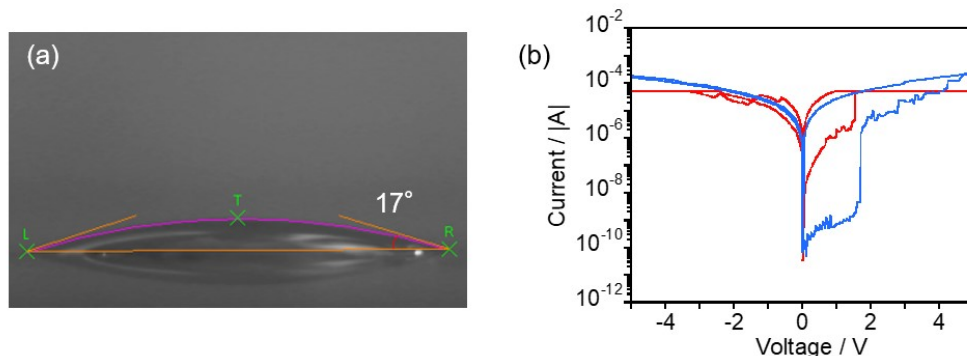

**Figure S7.** Contact angle measurement of sparse MAPS-SAMs on ZnO (a). Current-voltage curves of sparse MAPS-modified ZnO-based memory device (red trace) and dense MAPS-modified device (blue trace).

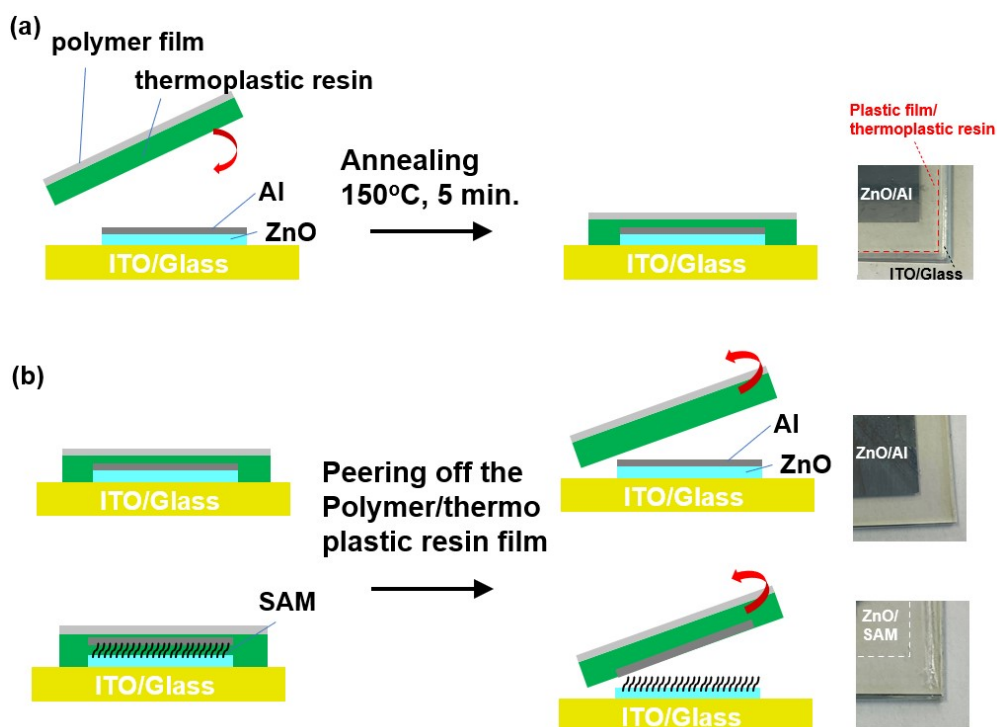

**Figure S8.** Illustration and pictures of the removing method of evaporated aluminum films from the ZnO-based devices<sup>2</sup> (lamination of polymer/thermoplastic resin film on (a) and removing of aluminum films from the ZnO with and without SAMs (b) ).

## 9. References

1. A. O. Sustaita, M. A. Mamo, E. Segura-Cardenas, Marisol Rerisol Reyes-Reyes, R. López-Sandoval, N. J. Coville, I. A. Hümmelgen, J. Nanosci. Nanotechnol. **2013**, *13*, 5680.
2. T. Fujinuki, M. Nakano, L. Wang, M. Shahiduzzaman, M. Karakawa, T. Taima, *Synth. Met.* **2022**, *285*, 117024.
